# Supplementary material for: Content Validation of PT Solutions Physical Therapy Clinical Pathways© for Management of Musculoskeletal (MSK) Conditions Using the CARE-CCF Tool
Source: Research Square preprint supplement (doi:10.21203/rs.3.rs-6473270/v1), 2025-05-19
Supplement: Supplementary file 1 [file 247769024fbac108176a159c.docx]

**Survey Design:**

***Demographic and Experience Questions:***

1. How many years of experience do you have in treating musculoskeletal conditions?
   - Less than 5 years
   - 5-10 years
   - More than 10 years
2. How would you rate your familiarity with clinical pathways or evidence-based treatment protocols?
   - Not familiar
   - Somewhat familiar
   - Familiar
   - Very familiar
3. Have you previously been involved in validating clinical algorithms or developing protocols?
   - Yes
   - No
4. Which of the following musculoskeletal areas do you consider yourself an expert in?
   *(Select all that apply vestibular care, pelvic health, cervical/orofacial pain, thoracolumbar, upper and lower quarter dysfunction, orthopedic, and/ or sports,)*

***Clinical Pathways Validation Questions:***

1. What key aspects of managing musculoskeletal conditions does the clinical pathway address effectively, and are there any important areas you feel it may not fully cover?

- Open-ended response

1. Do you find any key components missing in the proposed clinical pathway? If yes, please list them.
   - Open-ended response
2. Rate the clarity of the pathway in guiding clinical decision-making.
   - 5-point Likert scale (Strongly Disagree to Strongly Agree)
3. How relevant are the pathway’s recommendations for the management of MSK conditions?
   - 5-point Likert scale
4. Does the pathway appropriately incorporate evidence-based practices for musculoskeletal care?
   - 5-point Likert scale
5. How easy do you think it would be for clinicians to implement this pathway in a real-world clinical setting?
   - 5-point Likert scale
6. Are the patient outcomes associated with the pathway clearly defined?
   - 5-point Likert scale
7. Please rate the overall applicability of the pathway for daily practice in MSK conditions.
   - 5-point Likert scale
8. In your opinion, does this pathway need further modification or refinement?
   - Yes / No (If yes, provide suggestions)

***Content Relevance of the Clinical Pathways:***

Vestibular Pathway

- In your opinion, how relevant is the vestibular clinical pathway for the assessment and management of vestibular dysfunctions in daily practice?
  - 1 (Not relevant) to 5 (Highly relevant)
- Does this pathway adequately cover key diagnostic indicators (e.g., headache, dizziness, imbalance, vertigo) for vestibular dysfunctions?
  - Yes / No
  - If no, please provide suggestions for improvement.

Pelvic Health Pathway

- Does the pelvic health clinical pathway adequately address common diagnoses seen in your practice (e.g., incontinence, pelvic pain, prolapse)?
  - Yes / No
  - If no, please specify areas where it could be improved.
- How comprehensive do you find the interventions for pelvic floor dysfunction in both pre- and postnatal care?
  - 1 (Not comprehensive) to 5 (Highly comprehensive)

Cervical/Orofacial Pathway

- How relevant is the cervical/orofacial pathway for managing cervicogenic headaches and temporomandibular joint (TMJ) disorders?
  - 1 (Not relevant) to 5 (Highly relevant)
- Does the pathway include all critical interventions (e.g., pain management, manual therapy, jaw exercises) for managing TMJ disorder?
  - Yes / No
  - If no, what additional interventions would you recommend?

Thoracolumbar Pathway

- How comprehensive do you find the "Red Flags" section in the thoracolumbar pathway for identifying critical conditions that require referral (e.g., spinal fractures, malignancies, cauda equina syndrome)?
  - 1 (Not comprehensive) to 5 (Highly comprehensive)
- Does the pathway appropriately address low back pain management, including acute, subacute, and chronic stages?
  - Yes / No
  - If no, what adjustments could improve the pathway’s effectiveness?

Upper and Lower Quarter Pathways

- Are the outcome measures (e.g., grip strength, range of motion for the upper quarter; gait analysis, balance for the lower quarter) reflective of the key indicators you use to track patient progress?
  - 1 (Not reflective) to 5 (Highly reflective)
- How relevant are the wellness and rehabilitation components of the upper/lower quarter pathway for post-surgical versus non-surgical patients?
  - 1 (Not relevant) to 5 (Highly relevant)

***Clarity and Usability of the Clinical Pathways:***

Vestibular Pathway

- Is the vestibular maneuver decision tree clear in guiding diagnosis (e.g., Dix-Hallpike maneuver) and intervention choices (e.g., Epley maneuver)?
  - 1 (Not clear) to 5 (Very clear)

Pelvic Health Pathway

- Does the scheduling tree for the pelvic health Intervention pathway clearly outline frequency and progression for patients with varying severities of dysfunction?
  - Yes / No
  - If no, what modifications would improve clarity?

Upper and Lower Quarter Pathways

- Are the interventions (e.g., aerobic decision trees, strength protocols for the lower and upper quarter) clear in defining steps for graded exposure and activity progression?
  - 1 (Not clear) to 5 (Very clear)

Cervical/Orofacial Pathway

- How clear is the step-by-step guidance for jaw and neck rehabilitation in the Cervical/Orofacial Pathway?
  - 1 (Not clear) to 5 (Very clear)

Thoracolumbar Pathway

- Does the pathway clearly define the stages of recovery for patients with lumbar spine conditions, such as guidelines for acute pain management and return to activity?
  - 1 (Not clear) to 5 (Very clear)

***Applicability for Different Clinical Scenarios:***

Vestibular Pathway

- How appropriate is the use of the vestibular diagnostic pathway for differentiating between central and peripheral dysfunctions?
  - 1 (Not appropriate) to 5 (Very appropriate)

Pelvic Health Pathway

- Can the pelvic health pathway be universally applied to patients with chronic pelvic pain and those with stress incontinence?
  - Yes / No
  - If no, what specific changes could increase its applicability?

***Expert Feedback on Content and Improvements:***

- What important diagnoses, interventions, or pathways are missing from the provided Clinical Pathway set?
  - Open-ended response
- What additional tools or outcome measures could be included to enhance the effectiveness of these pathways in your clinical setting?
  - Open-ended response
- How important are these outcome measures in determining the effectiveness of the clinical pathways?
  - 1 (Not important) to 5 (Very important)
- Is the vestibular maneuver decision tree clear in guiding you through diagnosis and intervention choices?
  - 1 (Not clear) to 5 (Very clear)

[Round 1 survey link](https://forms.office.com/r/Liwjukpisk)

[Round 2 survey link](https://forms.office.com/r/FkuHPBrVXP)
